# Supplementary material
Source: publisher figshare collection journal article supplement (https://frontiersin.figshare.com/ndownloader/files/12358316)
Supplement: Supplementary file [file 12358316]

## Supplementary data

A

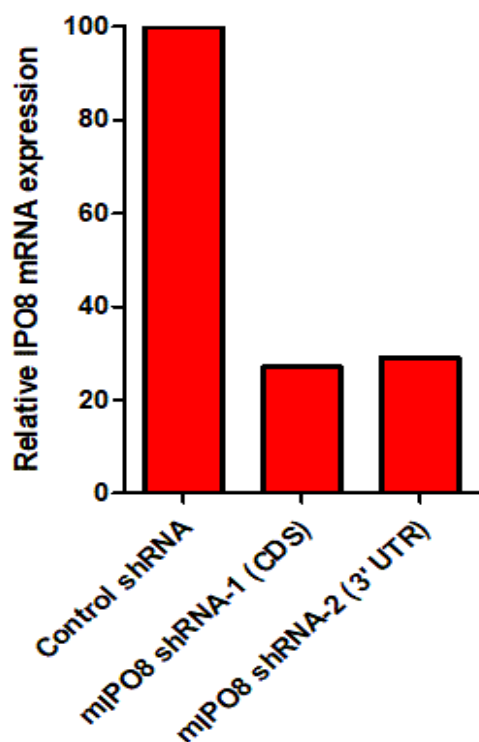

B

| shRNA                                | Sequence (5'-3')                                              |
|--------------------------------------|---------------------------------------------------------------|
| <b>Control shRNA</b><br>(Luciferase) | TACGCGCATAAGATTAGGG <b>TTCAAGAG</b> ACCCTAATCTTATGCGCGTA      |
| <b>mIPO8 shRNA-1</b><br>(3070-3090)  | GGACAACAGTGTGGATGAATAT <b>TTCAAGAG</b> ATATTCATCCACACTGTTGTCC |
| <b>mIPO8 shRNA-2</b><br>(3805-3825)  | GCATCCTTGCTTCCTTCAACCT <b>TTCAAGAG</b> AGTTGAAGGAAGCAAGGATGC  |

**Figure S1. Efficiency (A) and sequence (B) of the two shRNA directed against mIPO8 that were selected.** qRT-PCR was performed on FACS selected Neuro-2A cells to evaluate the efficiency of the shRNAs. The position of the targeted sequence on the mRNA (NM\_001081113) is given and the nucleotides forming the loop are in bold.

|                       |                                                                           |
|-----------------------|---------------------------------------------------------------------------|
| <b>mlIPO8 shRNA-1</b> | G GAC AAC AGT GTG GAT GAA TA                                              |
|                       | L D N S V D E Y                                                           |
| <b>hiIPO8*</b>        | CTT <u>GAT</u> <u>AAT</u> <u>TCC</u> <u>GTA</u> <u>GAC</u> <u>GAG</u> TAT |

**Figure S2. Nucleotide sequences of mouse IPO8 targeted by shRNA-1 and of the mutated human IPO8 transcript (hiIPO8\*) generated to make it resistant to shRNA-1.** The nucleotides in bold and underlined differ between the mutated human and wild-type mouse sequences. The amino acids they encode are identical.

|                 |                      |           |                       |
|-----------------|----------------------|-----------|-----------------------|
| <b>mlIPO8-F</b> | CTTCCTGGGACACCATGACC | 2701-2720 | (overlap exons 21-22) |
| <b>mlIPO8-R</b> | GACATGCGCCGATACACAAC | 3583-3564 | (exon 25)             |

**Figure S3. Sequences of the primers used for RT-PCR, their location along the mRNA (NM\_001081113) and corresponding exon number.**

|                 |                           |         |          |
|-----------------|---------------------------|---------|----------|
| <b>mlIPO8-F</b> | CGTGACAACATTGTGGAAGG      | 497-516 | (exon 3) |
| <b>mlIPO8-R</b> | CCAGTGACCAGGAAAATCGT      | 601-582 | (exon 4) |
| <b>mlIPO7-F</b> | TCAGAACAACACTGGATTACCTGTG | 133-156 | (exon 2) |
| <b>mlIPO7-R</b> | CGATCAGGCCAATATTGTGTTA    | 212-191 | (exon 3) |

**Figure S4. Sequences of the primers used for qRT-PCR, their location along the mRNA and corresponding exon number (Shimada et al., 2009; Sangel et al., 2014).**

### Supplementary data References

Sangel P, Oka M, Yoneda Y (2014) The role of importin-βs in the maintenance and lineage commitment of mouse embryonic stem cells. *FEBS Open Bio*, 4, 112-20

Shimada I, Matsui K, Iida R, Tsubota E, Matsuki T. (2009). Time course of housekeeping gene expression changes in diffuse alveolar damage induced by hyperoxia exposure in mice. *Leg. Med.* 11, S151–S154
